# Supplementary material for: Synthesis of magnetic graphene oxide-containing nanocomposite hydrogels for adsorption of crystal violet from aqueous solution
Source: Royal Society of Chemistry journal article supplement (doi:10.1039/c4ra17103a), 2015-01-01
Supplement: c4ra17103a1.pdf [file c4ra17103a1.pdf]

## Supporting Information

### **Synthesis of Magnetic Graphene Oxide-Containing Nanocomposite Hydrogels for Adsorption of Crystal Violet from Aqueous Solution**

Ali Pourjavadi\*, Mojtaba Nazari, Seyed Hassan Hosseini

*Polymer Research Laboratory, Department of Chemistry, Sharif University of Technology, Tehran, Iran*

*E-mail address: purjavad@sharif.edu; Phone/fax: (982)166165311*

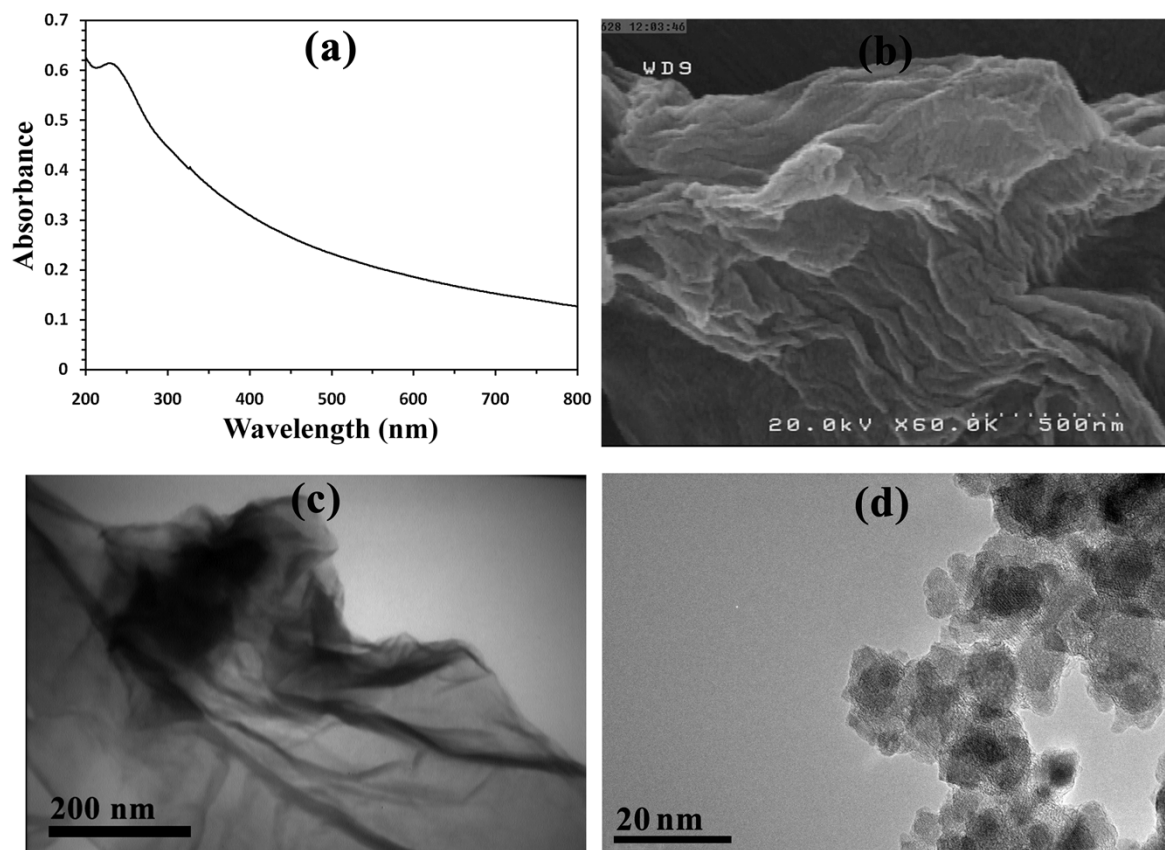

**Fig. S1** UV-vis spectrum (a) and SEM image (b) of GO. TEM image of GO (c) and MNP@SiO<sub>2</sub> (d)

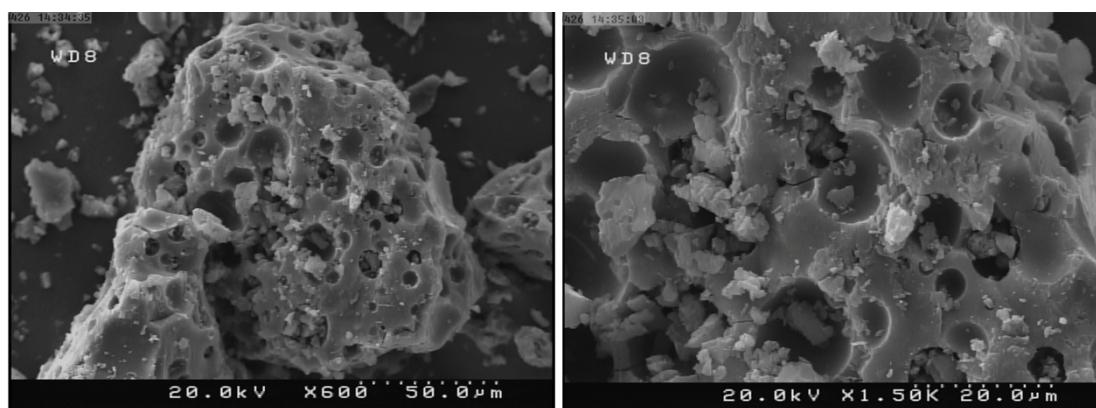

**Fig. S2** SEM images of hydrogel nanocomposite

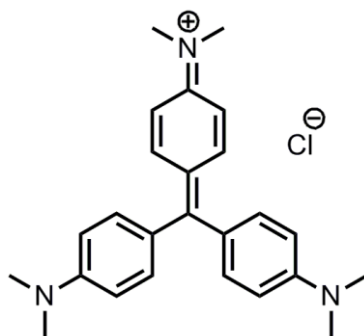

Fig. S3 Structure of crystal violet

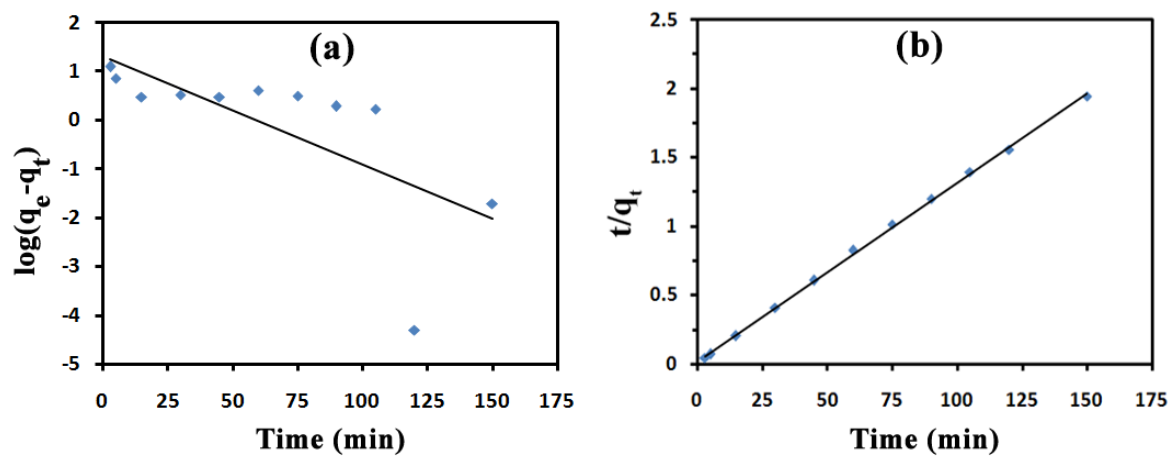

Fig. S4 Plot of pseudo-first-order (a) and pseudo-second-order (b) kinetic model

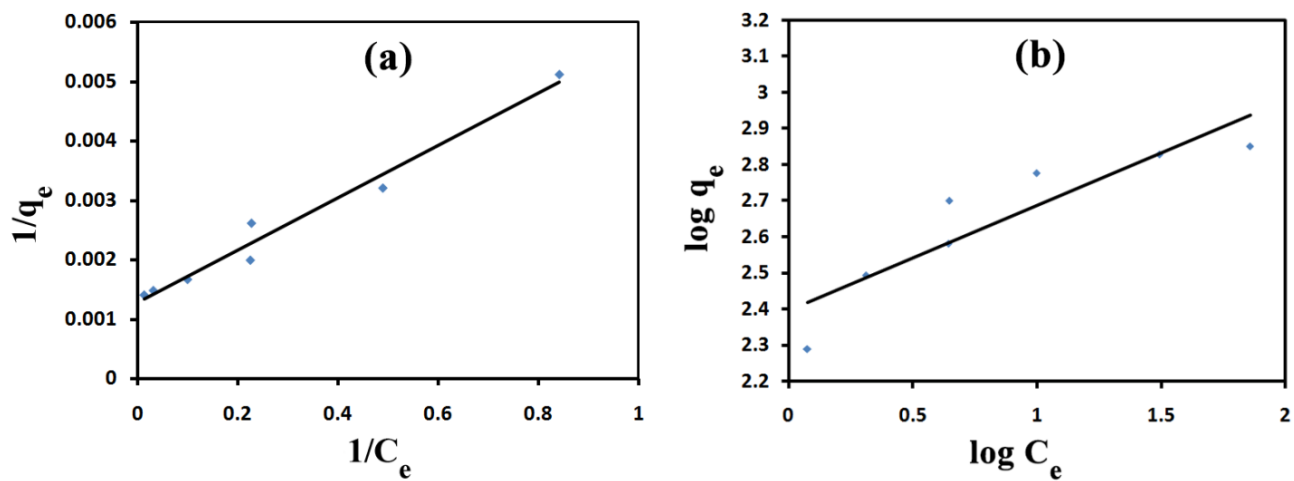

Fig. S5 Plot of Langmuir (a) and Freundlich (b) adsorption isotherm

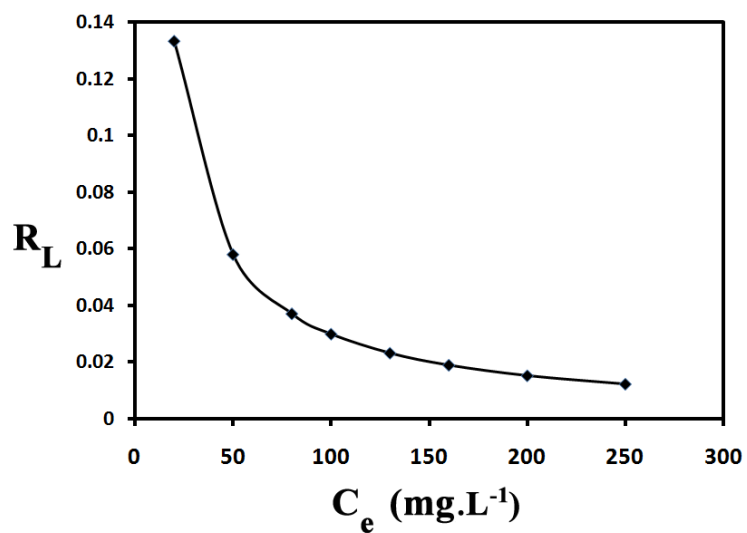

Fig. S6 Plot of equilibrium parameter ( $R_L$ ) versus initial concentration of CV
